# Supplementary material for: Periostin Is a Key Niche Component for Wound Metastasis of Melanoma
Source: PLoS One. 2015 Jun 17;10(6):e0129704. doi: 10.1371/journal.pone.0129704 (PMC4471156; doi:10.1371/journal.pone.0129704)
Supplement: S1 Table — (XLSX) [file pone.0129704.s009.xlsx]

## Sheet: Supply 1
Table S1. List of genes overexpressed over 4-fold in metastatic lesion compared with primary lesion of the patient.
(For genes supported by multiple probe sets, the probe set with the highest fold change between metastasis and primary
is listed)
Probe Set ID	Fold change	Gene Symbol	Gene Title
	(Metastasis /Primary)
207144_s_at	300.437	CITED1	Cbp/p300-interacting transactivator, with Glu/Asp-rich carboxy-terminal domain, 1
232010_at	252.625	FSTL5	follistatin-like 5
205433_at	176.9	BCHE	butyrylcholinesterase
240717_at	157.826	ABCB5	ATP-binding cassette, sub-family B (MDR/TAP), member 5
1554301_at	153.692	LOC645591	hypothetical protein LOC645591
1552348_at	144.58	PRSS33	protease, serine, 33
206626_x_at	125.76	SSX1	synovial sarcoma, X breakpoint 1
1552394_a_at	107.813	ENTHD1	ENTH domain containing 1
1555504_at	103.611	TYR	tyrosinase (oculocutaneous albinism IA)
202988_s_at	91.8994	RGS1	regulator of G-protein signaling 1
244829_at	72.3571	C6orf218	chromosome 6 open reading frame 218
1556200_a_at	72.1111	C10orf90	chromosome 10 open reading frame 90
242100_at	65.0217	CHSY3	chondroitin sulfate synthase 3
1558404_at	63.964	LOC644242	Hypothetical protein LOC644242
202859_x_at	60.0045	IL8	interleukin 8
1552742_at	60	KCNH8	potassium voltage-gated channel, subfamily H (eag-related), member 8
1565999_at	53	LOC286299	hypothetical protein LOC286299
1553808_a_at	52.05	NKX2-3	NK2 transcription factor related, locus 3 (Drosophila)
205278_at	50.0143	GAD1	glutamate decarboxylase 1 (brain, 67kDa)
230493_at	49.7078	SHISA2	shisa homolog 2 (Xenopus laevis)
205893_at	47.5986	NLGN1	neuroligin 1
1555786_s_at	47.0497	C14orf34	chromosome 14 open reading frame 34
1554299_at	45.8824	NPAS4	neuronal PAS domain protein 4
1553614_a_at	44.4	FLJ25694	hypothetical protein FLJ25694
1557345_at	44.1923	LOC283516	hypothetical protein LOC283516
220445_s_at	43.68	CSAG2 /// CSAG3	CSAG family, member 2 /// CSAG family, member 3
228245_s_at	42.7052	OVOS /// OVOS2	ovostatin /// ovostatin 2
240386_at	41.5822	TRPM1	Transient receptor potential cation channel, subfamily M, member 1
204475_at	41.2803	MMP1	matrix metallopeptidase 1 (interstitial collagenase)
206426_at	40.2633	MLANA	melan-A
221577_x_at	36.7311	GDF15	growth differentiation factor 15
220116_at	35.1132	KCNN2	potassium intermediate/small conductance calcium-activated channel, subfamily N, member 2
209875_s_at	32.3571	SPP1	secreted phosphoprotein 1
235494_at	31.1411	LSAMP	limbic system-associated membrane protein
231666_at	30.7272	PAX3	paired box 3
206837_at	29.55	ALX1	ALX homeobox 1
213417_at	28.4874	TBX2	T-box 2
211430_s_at	28.1991	IGH	immunoglobulin heavy locus
210179_at	27.9	KCNJ13	potassium inwardly-rectifying channel, subfamily J, member 13
205337_at	27.7125	DCT	dopachrome tautomerase
209842_at	26.9779	SOX10	SRY (sex determining region Y)-box 10
212190_at	26.1801	SERPINE2	serpin peptidase inhibitor, clade E, member 2
229178_at	25.6974	PRTG	protogenin homolog (Gallus gallus)
206558_at	25.6216	SIM2	single-minded homolog 2 (Drosophila)
203299_s_at	25.1651	AP1S2	adaptor-related protein complex 1, sigma 2 subunit
1556410_a_at	24.4878	KRTAP19-1	keratin associated protein 19-1
44783_s_at	24.2035	HEY1	hairy/enhancer-of-split related with YRPW motif 1
204017_at	23.9845	KDELR3	KDEL (Lys-Asp-Glu-Leu) endoplasmic reticulum protein retention receptor 3
232568_at	23.84	MGC24103	hypothetical MGC24103
227830_at	23.3804	GABRB3	gamma-aminobutyric acid (GABA) A receptor, beta 3
205493_s_at	23.303	DPYSL4	dihydropyrimidinase-like 4
236972_at	22.9323	TRIM63	tripartite motif-containing 63
214079_at	22.7182	DHRS2	dehydrogenase/reductase (SDR family) member 2
226066_at	22.5643	MITF	microphthalmia-associated transcription factor
235127_at	21.8077	PMP2	peripheral myelin protein 2
227231_at	21.5824	KIAA1211	KIAA1211
242328_at	21	RAB3C	RAB3C, member RAS oncogene family
226446_at	20.3627	HES6	hairy and enhancer of split 6 (Drosophila)
229797_at	20.0161	MCOLN3	mucolipin 3
205862_at	19.6314	GREB1	growth regulation by estrogen in breast cancer 1
233064_at	19.3598	ZFR2	zinc finger RNA binding protein 2
237273_at	18.9298	KCNU1	potassium channel, subfamily U, member 1
215695_s_at	18.8546	GYG2	glycogenin 2
1569971_at	18.7819	LOC100288721	similar to hCG2022860
228598_at	18.7788	DPP10	dipeptidyl-peptidase 10 (non-functional)
228375_at	18.4482	IGSF11	immunoglobulin superfamily, member 11
206376_at	18.2162	SLC6A15	solute carrier family 6 (neutral amino acid transporter), member 15
205694_at	18.1154	TYRP1	tyrosinase-related protein 1
204271_s_at	17.9646	EDNRB	endothelin receptor type B
218211_s_at	17.7215	MLPH	melanophilin
232504_at	17.713	LOC285628	hypothetical protein LOC285628
229860_x_at	17.6465	C4orf48	chromosome 4 open reading frame 48
47550_at	17.138	LZTS1	leucine zipper, putative tumor suppressor 1
215143_at	17.0674	DPY19L2P2	dpy-19-like 2 pseudogene 2 (C. elegans)
209170_s_at	16.8583	GPM6B	glycoprotein M6B
1561198_at	16.7707	LOC387790	hypothetical LOC387790
205234_at	15.9742	SLC16A4	solute carrier family 16, member 4 (monocarboxylic acid transporter 5)
225202_at	15.6358	RHOBTB3	Rho-related BTB domain containing 3
210002_at	15.6178	GATA6	GATA binding protein 6
214321_at	15.4336	NOV	nephroblastoma overexpressed gene
205122_at	15.3994	TMEFF1	transmembrane protein with EGF-like and two follistatin-like domains 1
212607_at	15.2855	AKT3	v-akt murine thymoma viral oncogene homolog 3 (protein kinase B, gamma)
239537_at	15.169	ST8SIA2	ST8 alpha-N-acetyl-neuraminide alpha-2,8-sialyltransferase 2
214841_at	15.1145	CNIH3	cornichon homolog 3 (Drosophila)
223503_at	15.0294	TMEM163	transmembrane protein 163
206448_at	15.0162	ZNF365	zinc finger protein 365
1556299_s_at	14.899	C12orf76	chromosome 12 open reading frame 76
235723_at	14.7757	BNC2	basonuclin 2
206696_at	14.6675	GPR143	G protein-coupled receptor 143
221558_s_at	14.5636	LEF1	lymphoid enhancer-binding factor 1
235758_at	14.2062	LOC100287428	similar to paraneoplastic antigen-like protein 6A
1564383_s_at	14.1	FLJ35934	FLJ35934 protein
205673_s_at	14.0152	ASB9	ankyrin repeat and SOCS box-containing 9
35147_at	13.9495	MCF2L	MCF.2 cell line derived transforming sequence-like
210394_x_at	13.7432	SSX4 /// SSX4B	synovial sarcoma, X breakpoint 4 /// synovial sarcoma, X breakpoint 4B
226372_at	13.7067	CHST11	carbohydrate (chondroitin 4) sulfotransferase 11
201468_s_at	13.6653	NQO1	NAD(P)H dehydrogenase, quinone 1
1570153_at	13.5316	C13orf38	chromosome 13 open reading frame 38
227099_s_at	13.441	AG2	protein Ag2 homolog
230789_at	13.4101	ZNF280B	zinc finger protein 280B
222317_at	13.103	PDE3B	phosphodiesterase 3B, cGMP-inhibited
214603_at	12.9983	MAGEA2 /// MAGEA2B	melanoma antigen family A, 2 /// melanoma antigen family A, 2B
238229_at	12.8964	TMEM67	transmembrane protein 67
215081_at	12.7031	KIAA1024	KIAA1024
209848_s_at	12.6256	SILV	silver homolog (mouse)
37892_at	12.5761	COL11A1	collagen, type XI, alpha 1
203349_s_at	12.5226	ETV5	ets variant 5
201313_at	12.4825	ENO2	enolase 2 (gamma, neuronal)
209598_at	12.4398	PNMA2	paraneoplastic antigen MA2
228776_at	12.4253	GJC1	gap junction protein, gamma 1, 45kDa
230560_at	12.1782	STXBP6	syntaxin binding protein 6 (amisyn)
222956_at	12.1311	FIGN	fidgetin
227925_at	12.1205	FLJ39051	Hypothetical protein LOC399972
204252_at	11.9897	CDK2	cyclin-dependent kinase 2
220615_s_at	11.8883	FAR2	fatty acyl CoA reductase 2
226893_at	11.8269	ABL2	v-abl Abelson murine leukemia viral oncogene homolog 2
228194_s_at	11.8026	SORCS1	sortilin-related VPS10 domain containing receptor 1
223362_s_at	11.707	SEPT3	septin 3
229552_at	11.6462	LOC283454	hypothetical protein LOC283454
204086_at	11.6072	PRAME	preferentially expressed antigen in melanoma
232122_s_at	11.5825	VEPH1	ventricular zone expressed PH domain homolog 1 (zebrafish)
204237_at	11.5056	GULP1	GULP, engulfment adaptor PTB domain containing 1
211576_s_at	11.4679	SLC19A1	solute carrier family 19 (folate transporter), member 1
204584_at	11.4445	L1CAM	L1 cell adhesion molecule
242455_at	11.0669	POU3F2	POU class 3 homeobox 2
208025_s_at	11.0378	HMGA2	high mobility group AT-hook 2
238756_at	10.933	GAS2L3	Growth arrest-specific 2 like 3
230272_at	10.8889	LOC645323	hypothetical LOC645323
213241_at	10.8781	PLXNC1	plexin C1
216874_at	10.8571	DKFZp686O1327	Hypothetical gene supported by BC043549; BX648102
229649_at	10.8136	NRXN3	neurexin 3
212686_at	10.7857	PPM1H	protein phosphatase, Mg2+/Mn2+ dependent, 1H
236044_at	10.7109	PPAPDC1A	phosphatidic acid phosphatase type 2 domain containing 1A
203434_s_at	10.6437	MME	membrane metallo-endopeptidase
213790_at	10.6288	ADAM12	ADAM metallopeptidase domain 12
241396_at	10.6008	NEDD4L	neural precursor cell expressed, developmentally down-regulated 4-like
215121_x_at	10.5603	CYAT1 /// IGLV1-44	cyclosporin A transporter 1 /// immunoglobulin lambda variable 1-44
203695_s_at	10.4494	DFNA5	deafness, autosomal dominant 5
207060_at	10.4201	EN2	engrailed homeobox 2
1557107_at	10.3333	LOC286002	hypothetical LOC286002
218678_at	10.2498	NES	nestin
231257_at	10.2075	TCERG1L	transcription elongation regulator 1-like
220129_at	10.2023	SOHLH2	spermatogenesis and oogenesis specific basic helix-loop-helix 2
226905_at	10.0397	FAM101B	family with sequence similarity 101, member B
1555579_s_at	10.0122	PTPRM	protein tyrosine phosphatase, receptor type, M
223679_at	9.99709	CTNNB1	catenin (cadherin-associated protein), beta 1, 88kDa
200958_s_at	9.98187	SDCBP	syndecan binding protein (syntenin)
202986_at	9.95294	ARNT2	aryl-hydrocarbon receptor nuclear translocator 2
243969_at	9.9292	SLC24A4	solute carrier family 24 (sodium/potassium/calcium exchanger), member 4
209959_at	9.8876	NR4A3	nuclear receptor subfamily 4, group A, member 3
209686_at	9.87899	S100B	S100 calcium binding protein B
236351_at	9.81325	LOC389023	hypothetical gene supported by BC032913; BC048425
237737_at	9.71786	LOC100289026	similar to hCG1744891
216442_x_at	9.63031	FN1	fibronectin 1
230831_at	9.60667	FRMD5	FERM domain containing 5
202499_s_at	9.38137	SLC2A3	solute carrier family 2 (facilitated glucose transporter), member 3
235639_at	9.3637	CDH19	cadherin 19, type 2
227926_s_at	9.28036	LOC200030 /// NBPF11	neuroblastoma breakpoint family, member 11-like /// neuroblastoma breakpoint family, member 11
221671_x_at	9.2279	IGK@ /// IGKC	immunoglobulin kappa locus /// immunoglobulin kappa constant
235667_at	9.21429	LOC643783	hypothetical LOC643783
225531_at	9.14516	CABLES1	Cdk5 and Abl enzyme substrate 1
204014_at	9.101	DUSP4	dual specificity phosphatase 4
227628_at	9.00324	GPX8	glutathione peroxidase 8 (putative)
1558301_a_at	9	EFCAB5	EF-hand calcium binding domain 5
209072_at	8.97528	MBP	myelin basic protein
58780_s_at	8.92928	FLJ10357	protein SOLO
206601_s_at	8.8	HOXD3	homeobox D3
235333_at	8.7989	B4GALT6	UDP-Gal:betaGlcNAc beta 1,4- galactosyltransferase, polypeptide 6
230748_at	8.77182	SLC16A6	solute carrier family 16, member 6 (monocarboxylic acid transporter 7)
244710_at	8.75704	LRGUK	leucine-rich repeats and guanylate kinase domain containing
228262_at	8.7	MAP7D2	MAP7 domain containing 2
227080_at	8.63345	ZNF697	zinc finger protein 697
230788_at	8.53367	GCNT2	glucosaminyl (N-acetyl) transferase 2, I-branching enzyme (I blood group)
209138_x_at	8.51133	IGL@	Immunoglobulin lambda locus
236945_at	8.50424	C9orf93	chromosome 9 open reading frame 93
202478_at	8.50343	TRIB2	tribbles homolog 2 (Drosophila)
238422_at	8.45946	LOC151534	hypothetical LOC151534
218585_s_at	8.44664	DTL	denticleless homolog (Drosophila)
223795_at	8.41139	TSPAN10	tetraspanin 10
213355_at	8.39649	ST3GAL6	ST3 beta-galactoside alpha-2,3-sialyltransferase 6
205681_at	8.34343	BCL2A1	BCL2-related protein A1
206256_at	8.34112	CPN1	carboxypeptidase N, polypeptide 1
222291_at	8.33834	FAM149A	family with sequence similarity 149, member A
201860_s_at	8.30508	PLAT	plasminogen activator, tissue
229441_at	8.29769	PRSS23	Protease, serine, 23
219312_s_at	8.27083	ZBTB10	zinc finger and BTB domain containing 10
229430_at	8.26923	C8orf46	chromosome 8 open reading frame 46
210944_s_at	8.26136	CAPN3	calpain 3, (p94)
225799_at	8.24755	LOC541471 /// NCRNA00152	hypothetical LOC541471 /// non-protein coding RNA 152
212597_s_at	8.21685	HMGXB4	HMG box domain containing 4
226402_at	8.1633	CYP2U1	cytochrome P450, family 2, subfamily U, polypeptide 1
219636_s_at	8.13407	ARMC9	armadillo repeat containing 9
229002_at	8.13239	FAM69B	family with sequence similarity 69, member B
228033_at	8.13147	E2F7	E2F transcription factor 7
1555867_at	8.08571	GNG4	guanine nucleotide binding protein (G protein), gamma 4
229278_at	8.07692	USP51	ubiquitin specific peptidase 51
222153_at	8.00704	MYEF2	myelin expression factor 2
239697_x_at	8	C3orf67	chromosome 3 open reading frame 67
227396_at	7.98615	PTPRJ	protein tyrosine phosphatase, receptor type, J
226592_at	7.98518	ZNF618	zinc finger protein 618
215028_at	7.94267	SEMA6A	sema domain, transmembrane domain, and cytoplasmic domain, 6A
240440_at	7.86585	NPL	N-acetylneuraminate pyruvate lyase (dihydrodipicolinate synthase)
235486_at	7.85849	C11orf41	chromosome 11 open reading frame 41
203545_at	7.85486	ALG8	asparagine-linked glycosylation 8, alpha-1,3 glucosyltransferase homolog
229256_at	7.81987	PGM2L1	phosphoglucomutase 2-like 1
202609_at	7.76725	EPS8	epidermal growth factor receptor pathway substrate 8
202944_at	7.73857	NAGA	N-acetylgalactosaminidase, alpha-
204011_at	7.72227	SPRY2	sprouty homolog 2 (Drosophila)
200644_at	7.70878	MARCKSL1	MARCKS-like 1
225382_at	7.70841	ZNF275	zinc finger protein 275
213638_at	7.68578	PHACTR1	phosphatase and actin regulator 1
205508_at	7.63258	SCN1B	sodium channel, voltage-gated, type I, beta
221031_s_at	7.6303	APOLD1	apolipoprotein L domain containing 1
206638_at	7.60976	HTR2B	5-hydroxytryptamine (serotonin) receptor 2B
202237_at	7.58392	NNMT	nicotinamide N-methyltransferase
241612_at	7.5649	FOXD3	forkhead box D3
219557_s_at	7.56322	NRIP3	nuclear receptor interacting protein 3
228564_at	7.56176	LOC375295	hypothetical protein LOC375295
242957_at	7.51667	VWCE	von Willebrand factor C and EGF domains
204944_at	7.51091	PTPRG	protein tyrosine phosphatase, receptor type, G
202185_at	7.48602	PLOD3	procollagen-lysine, 2-oxoglutarate 5-dioxygenase 3
237939_at	7.45794	EPHA5	EPH receptor A5
1569110_x_at	7.44791	LOC728613	programmed cell death 6 pseudogene
244764_at	7.43933	HIVEP3	Human immunodeficiency virus type I enhancer binding protein 3
216973_s_at	7.4324	HOXB7	homeobox B7
214023_x_at	7.39761	TUBB2B	tubulin, beta 2B
203759_at	7.37616	ST3GAL4	ST3 beta-galactoside alpha-2,3-sialyltransferase 4
237393_at	7.37093	LOC441617	Similar to hCG1820409
217996_at	7.3585	PHLDA1	pleckstrin homology-like domain, family A, member 1
243945_at	7.32237	TRIM2	tripartite motif-containing 2
224833_at	7.31008	ETS1	v-ets erythroblastosis virus E26 oncogene homolog 1 (avian)
209505_at	7.30739	NR2F1	Nuclear receptor subfamily 2, group F, member 1
244198_at	7.29936	RANBP17	RAN binding protein 17
206560_s_at	7.28703	MIA	melanoma inhibitory activity
228551_at	7.28525	DENND5B	DENN/MADD domain containing 5B
213543_at	7.27047	SGCD	sarcoglycan, delta (35kDa dystrophin-associated glycoprotein)
204720_s_at	7.21875	DNAJC6	DnaJ (Hsp40) homolog, subfamily C, member 6
225147_at	7.21784	CYTH3	cytohesin 3
201470_at	7.20242	GSTO1	glutathione S-transferase omega 1
204352_at	7.18754	TRAF5	TNF receptor-associated factor 5
218330_s_at	7.18	NAV2	neuron navigator 2
212651_at	7.17745	RHOBTB1	Rho-related BTB domain containing 1
205347_s_at	7.14286	TMSB15A	thymosin beta 15a
235359_at	7.12676	LRRC33	leucine rich repeat containing 33
228702_at	7.09859	FLJ43663	hypothetical LOC378805
204035_at	7.09412	SCG2	secretogranin II
216947_at	7.07143	LOC100288941	hypothetical protein LOC100288941
229253_at	7.05193	THEM4	thioesterase superfamily member 4
207719_x_at	6.99777	CEP170	centrosomal protein 170kDa
203510_at	6.97702	MET	met proto-oncogene (hepatocyte growth factor receptor)
217853_at	6.97675	TNS3	tensin 3
227072_at	6.96003	RTTN	rotatin
235238_at	6.91871	SHC4	SHC (Src homology 2 domain containing) family, member 4
236745_at	6.90865	CCDC78	coiled-coil domain containing 78
203607_at	6.8984	INPP5F	inositol polyphosphate-5-phosphatase F
213906_at	6.83916	MYBL1	v-myb myeloblastosis viral oncogene homolog (avian)-like 1
213107_at	6.83209	TNIK	TRAF2 and NCK interacting kinase
209498_at	6.82713	CEACAM1	carcinoembryonic antigen-related cell adhesion molecule 1
203820_s_at	6.81854	IGF2BP3	insulin-like growth factor 2 mRNA binding protein 3
1565685_at	6.79592	LOC400940	hypothetical LOC400940
242584_at	6.78082	FAM161A	family with sequence similarity 161, member A
1554609_at	6.78074	LOC100287896	Similar to cag
211084_x_at	6.7782	PRKD3	protein kinase D3
1556051_a_at	6.77597	BICD1	bicaudal D homolog 1 (Drosophila)
222116_s_at	6.75592	TBC1D16	TBC1 domain family, member 16
241749_at	6.70946	MURC	muscle-related coiled-coil protein
227870_at	6.63	IGDCC4	immunoglobulin superfamily, DCC subclass, member 4
1554274_a_at	6.61856	SSH1	slingshot homolog 1 (Drosophila)
207426_s_at	6.61162	TNFSF4	tumor necrosis factor (ligand) superfamily, member 4
230888_at	6.60746	WDR91	WD repeat domain 91
206864_s_at	6.59375	HRK	harakiri, BCL2 interacting protein (contains only BH3 domain)
204955_at	6.56983	SRPX	sushi-repeat-containing protein, X-linked
208594_x_at	6.5625	LILRA6	leukocyte immunoglobulin-like receptor, subfamily A, member 6
214608_s_at	6.5625	EYA1	eyes absent homolog 1 (Drosophila)
1569661_at	6.54661	NPAS3	neuronal PAS domain protein 3
233375_at	6.53571	EFCAB2	EF-hand calcium binding domain 2
221530_s_at	6.53427	BHLHE41	basic helix-loop-helix family, member e41
205880_at	6.52834	PRKD1	protein kinase D1
1556472_s_at	6.51389	SCML4	sex comb on midleg-like 4 (Drosophila)
1554018_at	6.51146	GPNMB	glycoprotein (transmembrane) nmb
1555920_at	6.50856	CBX3	Chromobox homolog 3 (HP1 gamma homolog, Drosophila)
203651_at	6.50533	ZFYVE16	zinc finger, FYVE domain containing 16
213040_s_at	6.48214	NPTXR	neuronal pentraxin receptor
204727_at	6.4472	WDHD1	WD repeat and HMG-box DNA binding protein 1
211709_s_at	6.43839	CLEC11A	C-type lectin domain family 11, member A
228904_at	6.43811	HOXB3	homeobox B3
203410_at	6.42401	AP3M2	adaptor-related protein complex 3, mu 2 subunit
204597_x_at	6.40588	STC1	stanniocalcin 1
201416_at	6.39801	SOX4	SRY (sex determining region Y)-box 4
207759_s_at	6.39706	TSNAX-DISC1	disrupted in schizophrenia 1 /// translin-associated factor X /// TSNAX-DISC1 gene
215946_x_at	6.34043	IGLL3	immunoglobulin lambda-like polypeptide 3
1553938_a_at	6.33333	STK32A	serine/threonine kinase 32A
203217_s_at	6.32412	ST3GAL5	ST3 beta-galactoside alpha-2,3-sialyltransferase 5
49329_at	6.31584	KLHL22	kelch-like 22 (Drosophila)
201666_at	6.293	TIMP1	TIMP metallopeptidase inhibitor 1
205207_at	6.27049	IL6	interleukin 6 (interferon, beta 2)
243689_s_at	6.20769	FRG1B	FSHD region gene 1 family, member B
227626_at	6.20623	PAQR8	progestin and adipoQ receptor family member VIII
217022_s_at	6.18972	IGH	immunoglobulin heavy locus
210198_s_at	6.18478	PLP1	proteolipid protein 1
205334_at	6.16037	S100A1	S100 calcium binding protein A1
203879_at	6.12709	PIK3CD	phosphoinositide-3-kinase, catalytic, delta polypeptide
220245_at	6.07485	SLC45A2	solute carrier family 45, member 2
235045_at	6.05649	RBM7	RNA binding motif protein 7
234303_s_at	6.02765	GPR85	G protein-coupled receptor 85
205110_s_at	5.99408	FGF13	fibroblast growth factor 13
228785_at	5.97281	ZNF281	Zinc finger protein 281
229947_at	5.96395	PI15	peptidase inhibitor 15
230720_at	5.94572	RNF182	ring finger protein 182
1562583_s_at	5.93023	TPTE2P1	Transmembrane phosphoinositide 3-phosphatase and tensin homolog 2 pseudogene 1
1558692_at	5.91827	C1orf85	chromosome 1 open reading frame 85
217127_at	5.85	CTH	cystathionase (cystathionine gamma-lyase)
206104_at	5.85	ISL1	ISL LIM homeobox 1
200663_at	5.83585	CD63	CD63 molecule
203723_at	5.81581	ITPKB	inositol 1,4,5-trisphosphate 3-kinase B
203180_at	5.77766	ALDH1A3	aldehyde dehydrogenase 1 family, member A3
242136_x_at	5.77397	MGC70870	C-terminal binding protein 2 pseudogene
216250_s_at	5.75811	LPXN	leupaxin
222240_s_at	5.75224	ISYNA1	inositol-3-phosphate synthase 1
213435_at	5.75064	SATB2	SATB homeobox 2
212094_at	5.74609	PEG10	paternally expressed 10
202052_s_at	5.74602	RAI14	retinoic acid induced 14
235199_at	5.74602	RNF125	ring finger protein 125
1569303_s_at	5.71597	RGS20	regulator of G-protein signaling 20
203729_at	5.71591	EMP3	epithelial membrane protein 3
207543_s_at	5.7147	P4HA1	prolyl 4-hydroxylase, alpha polypeptide I
217989_at	5.7115	HSD17B11	hydroxysteroid (17-beta) dehydrogenase 11
1555571_at	5.70603	IMMP2L	IMP2 inner mitochondrial membrane peptidase-like (S. cerevisiae)
228198_s_at	5.65831	FAHD2A /// LOC729234	fumarylacetoacetate hydrolase domain containing 2A /// fumarylacetoacetate hydrolase domain containing 2 pseudogene
203875_at	5.64463	SMARCA1	SWI/SNF related, matrix associated, actin dependent regulator of chromatin,subfamily a, member 1
232684_at	5.62099	LOC253264	hypothetical protein LOC253264
1568597_at	5.60673	LOC646762	hypothetical LOC646762
223741_s_at	5.60405	TTYH2	tweety homolog 2 (Drosophila)
209651_at	5.58172	TGFB1I1	transforming growth factor beta 1 induced transcript 1
204187_at	5.54746	GMPR	guanosine monophosphate reductase
222972_at	5.54348	VSX1	visual system homeobox 1
238886_at	5.54187	TMED10	transmembrane emp24-like trafficking protein 10 (yeast)
235942_at	5.53125	NCRNA00230A /// NCRNA00230B	non-protein coding RNA 230A /// non-protein coding RNA 230B
231130_at	5.52632	FKBP7	FK506 binding protein 7
221958_s_at	5.52335	WLS	wntless homolog (Drosophila)
208891_at	5.51881	DUSP6	dual specificity phosphatase 6
209695_at	5.45517	PTP4A3	protein tyrosine phosphatase type IVA, member 3
239572_at	5.45496	GJA3	gap junction protein, alpha 3, 46kDa
225681_at	5.45483	CTHRC1	collagen triple helix repeat containing 1
225484_at	5.44759	TSGA14	testis specific, 14
203304_at	5.43289	BAMBI	BMP and activin membrane-bound inhibitor homolog (Xenopus laevis)
200782_at	5.4168	ANXA5	annexin A5
204467_s_at	5.40854	SNCA	synuclein, alpha (non A4 component of amyloid precursor)
206498_at	5.39577	OCA2	oculocutaneous albinism II
205975_s_at	5.39503	HOXD1	homeobox D1
225946_at	5.38996	RASSF8	Ras association (RalGDS/AF-6) domain family (N-terminal) member 8
207714_s_at	5.35897	SERPINH1	serpin peptidase inhibitor, clade H (heat shock protein 47), member 1
219217_at	5.34291	NARS2	asparaginyl-tRNA synthetase 2, mitochondrial (putative)
235911_at	5.33301	MFI2	antigen p97 identified by monoclonal antibodies 133.2 and 96.5
227530_at	5.33156	AKAP12	A kinase (PRKA) anchor protein 12
222171_s_at	5.325	PKNOX2	PBX/knotted 1 homeobox 2
244819_x_at	5.30899	PSPH	phosphoserine phosphatase
203794_at	5.30352	CDC42BPA	CDC42 binding protein kinase alpha (DMPK-like)
221974_at	5.29884	IPW	imprinted in Prader-Willi syndrome (non-protein coding)
202211_at	5.27682	ARFGAP3	ADP-ribosylation factor GTPase activating protein 3
235489_at	5.26197	RHOJ	ras homolog gene family, member J
206377_at	5.25429	FOXF2	forkhead box F2
224494_x_at	5.24745	HSD17B14	hydroxysteroid (17-beta) dehydrogenase 14
235289_at	5.23636	EIF5A2	eukaryotic translation initiation factor 5A2
225726_s_at	5.23112	PLEKHH1	pleckstrin homology domain containing, family H member 1
226997_at	5.21193	ADAMTS12	ADAM metallopeptidase with thrombospondin type 1 motif, 12
1557754_at	5.20167	LOC401068	hypothetical LOC401068
218471_s_at	5.19988	BBS1	Bardet-Biedl syndrome 1
222848_at	5.1932	CENPK	centromere protein K
1569788_at	5.16289	ST8SIA1	ST8 alpha-N-acetyl-neuraminide alpha-2,8-sialyltransferase 1
244164_at	5.16279	NCRNA00204B	Non-protein coding RNA 204B
227198_at	5.15493	AFF3	AF4/FMR2 family, member 3
230746_s_at	5.15306	LOC100288985	hypothetical protein LOC100288985
202376_at	5.15172	SERPINA3	serpin peptidase inhibitor, clade A, member 3
232794_at	5.14178	LOC153682	Hypothetical protein LOC153682
210809_s_at	5.12643	POSTN	periostin, osteoblast specific factor
242283_at	5.12	DNAH14	dynein, axonemal, heavy chain 14
231182_at	5.11141	WIPF1	WAS/WASL interacting protein family, member 1
225303_at	5.09747	KIRREL	kin of IRRE like (Drosophila)
37966_at	5.07862	PARVB	parvin, beta
239680_at	5.03858	WDR76	WD repeat domain 76
209172_s_at	5.03415	CENPF	centromere protein F, 350/400ka (mitosin)
37547_at	5.03313	BBS9	Bardet-Biedl syndrome 9
209185_s_at	5.02848	IRS2	insulin receptor substrate 2
212372_at	5.02503	MYH10	myosin, heavy chain 10, non-muscle
219381_at	5.01702	C5orf42	chromosome 5 open reading frame 42
203139_at	5.01289	DAPK1	death-associated protein kinase 1
239816_at	4.99074	POLD3	Polymerase (DNA-directed), delta 3, accessory subunit
217553_at	4.98571	MGC87042	STEAP family protein MGC87042
237470_at	4.98243	DOCK7	dedicator of cytokinesis 7
223065_s_at	4.97089	STARD3NL	STARD3 N-terminal like
228391_at	4.96269	CYP4V2	cytochrome P450, family 4, subfamily V, polypeptide 2
211980_at	4.95854	COL4A1	collagen, type IV, alpha 1
230277_at	4.95703	LOC100289187	hypothetical protein LOC100289187
224812_at	4.95562	HIBADH	3-hydroxyisobutyrate dehydrogenase
224759_s_at	4.94754	C12orf23	chromosome 12 open reading frame 23
228523_at	4.94505	NANOS1	nanos homolog 1 (Drosophila)
222380_s_at	4.94387	PDCD6	Programmed cell death 6
206230_at	4.9375	LHX1	LIM homeobox 1
213869_x_at	4.93235	THY1	Thy-1 cell surface antigen
37986_at	4.93151	EPOR	erythropoietin receptor
214428_x_at	4.9278	C4A /// C4B /// LOC100292046	complement component 4A /// complement component 4B /// similar to complement component 4A
243363_at	4.92211	LOC641518	hypothetical LOC641518
206632_s_at	4.90687	APOBEC3B	apolipoprotein B mRNA editing enzyme, catalytic polypeptide-like 3B
203300_x_at	4.90654	AP1S2	adaptor-related protein complex 1, sigma 2 subunit
1556427_s_at	4.8816	LRRN4CL	LRRN4 C-terminal like
205376_at	4.86243	INPP4B	inositol polyphosphate-4-phosphatase, type II, 105kDa
213883_s_at	4.84753	TM2D1	TM2 domain containing 1
227697_at	4.84689	SOCS3	suppressor of cytokine signaling 3
204044_at	4.83851	QPRT	quinolinate phosphoribosyltransferase
236126_at	4.83133	ACVR2B	activin A receptor, type IIB
241710_at	4.82609	LOC728819	hCG1645220
203738_at	4.8248	C5orf22	chromosome 5 open reading frame 22
1553994_at	4.8219	NT5E	5'-nucleotidase, ecto (CD73)
236046_at	4.81684	FLJ44896	FLJ44896 protein
222572_at	4.80538	PDP1	pyruvate dehyrogenase phosphatase catalytic subunit 1
211964_at	4.79172	COL4A2	collagen, type IV, alpha 2
228384_s_at	4.76852	PYROXD2	pyridine nucleotide-disulphide oxidoreductase domain 2
236249_at	4.75379	IKBIP	IKBKB interacting protein
230369_at	4.74294	GPR161	G protein-coupled receptor 161
203688_at	4.73454	PKD2	polycystic kidney disease 2 (autosomal dominant)
223698_at	4.73415	SLC25A36	solute carrier family 25, member 36
214917_at	4.73001	PRKAA1	protein kinase, AMP-activated, alpha 1 catalytic subunit
227713_at	4.7242	KATNAL1	katanin p60 subunit A-like 1
214830_at	4.71924	SLC38A6	solute carrier family 38, member 6
210233_at	4.7168	IL1RAP	interleukin 1 receptor accessory protein
210112_at	4.71544	HPS1	Hermansky-Pudlak syndrome 1
213035_at	4.7112	ANKRD28	ankyrin repeat domain 28
209781_s_at	4.70954	KHDRBS3	KH domain containing, RNA binding, signal transduction associated 3
214612_x_at	4.69548	MAGEA6	melanoma antigen family A, 6
206529_x_at	4.6947	SLC26A4	solute carrier family 26, member 4
205498_at	4.67032	GHR	growth hormone receptor
212488_at	4.66971	COL5A1	collagen, type V, alpha 1
243618_s_at	4.66772	ZNF827	Zinc finger protein 827
201651_s_at	4.66594	PACSIN2	protein kinase C and casein kinase substrate in neurons 2
244578_at	4.656	LCP2	lymphocyte cytosolic protein 2
236681_at	4.65464	HOXD13	homeobox D13
214260_at	4.6482	COPS8	COP9 constitutive photomorphogenic homolog subunit 8 (Arabidopsis)
231871_at	4.64659	GPR180	G protein-coupled receptor 180
202311_s_at	4.63815	COL1A1	collagen, type I, alpha 1
202087_s_at	4.63804	CTSL1	cathepsin L1
225520_at	4.59826	MTHFD1L	methylenetetrahydrofolate dehydrogenase (NADP+ dependent) 1-like
203167_at	4.58669	TIMP2	TIMP metallopeptidase inhibitor 2
227176_at	4.58449	SLC2A13	solute carrier family 2 (facilitated glucose transporter), member 13
212122_at	4.5798	RHOQ	ras homolog gene family, member Q
216272_x_at	4.57581	SYDE1	synapse defective 1, Rho GTPase, homolog 1 (C. elegans)
235334_at	4.56944	ST6GALNAC3	ST6 (alpha-N-acetyl-neuraminyl-2,3-beta-galactosyl-1,3)-N-acetylgalactosaminide alpha-2,6-sialyltransferase 3
202903_at	4.5589	LSM5	LSM5 homolog, U6 small nuclear RNA associated (S. cerevisiae)
227239_at	4.55666	FAM126A	family with sequence similarity 126, member A
203106_s_at	4.55474	VPS41	vacuolar protein sorting 41 homolog (S. cerevisiae)
210999_s_at	4.54728	GRB10	growth factor receptor-bound protein 10
214211_at	4.54711	FTH1	ferritin, heavy polypeptide 1
218093_s_at	4.53156	ANKRD10	ankyrin repeat domain 10
219372_at	4.51546	IFT81	intraflagellar transport 81 homolog (Chlamydomonas)
232067_at	4.51053	C6orf168	chromosome 6 open reading frame 168
237515_at	4.50829	TMEM56	transmembrane protein 56
213371_at	4.5032	LDB3	LIM domain binding 3
243649_at	4.5	FBXO7	F-box protein 7
208964_s_at	4.49139	FADS1	fatty acid desaturase 1
209198_s_at	4.48387	SYT11	synaptotagmin XI
212013_at	4.48133	PXDN	peroxidasin homolog (Drosophila)
210108_at	4.47778	CACNA1D	calcium channel, voltage-dependent, L type, alpha 1D subunit
204026_s_at	4.47135	ZWINT	ZW10 interactor
208051_s_at	4.47124	PAIP1	poly(A) binding protein interacting protein 1
230251_at	4.46356	C6orf176	chromosome 6 open reading frame 176
36612_at	4.4567	FAM168A	family with sequence similarity 168, member A
203313_s_at	4.45437	TGIF1	TGFB-induced factor homeobox 1
229538_s_at	4.44563	IQGAP3	IQ motif containing GTPase activating protein 3
209740_s_at	4.4351	PNPLA4	patatin-like phospholipase domain containing 4
202651_at	4.42737	LPGAT1	lysophosphatidylglycerol acyltransferase 1
223461_at	4.41992	TBC1D7	TBC1 domain family, member 7
235088_at	4.41585	C4orf46	chromosome 4 open reading frame 46
203274_at	4.4148	F8A1 /// F8A2 /// F8A3	coagulation factor VIII-associated 1 /// coagulation factor VIII-associated 2 /// coagulation factor VIII-associated 3
1552897_a_at	4.41121	KCNG3	potassium voltage-gated channel, subfamily G, member 3
223266_at	4.38896	STRADB	STE20-related kinase adaptor beta
234297_at	4.38502	RGS8 /// SDHAP3	Regulator of G-protein signaling 8 /// Succinate dehydrogenase complex, subunit A, flavoprotein pseudogene 3
212180_at	4.37272	CRKL	v-crk sarcoma virus CT10 oncogene homolog (avian)-like
241762_at	4.36978	FBXO32	F-box protein 32
232643_at	4.36098	POLR2F	Polymerase (RNA) II (DNA directed) polypeptide F
212353_at	4.34718	SULF1	sulfatase 1
225626_at	4.33901	PAG1	phosphoprotein associated with glycosphingolipid microdomains 1
225237_s_at	4.33599	MSI2	musashi homolog 2 (Drosophila)
217841_s_at	4.32636	PPME1	protein phosphatase methylesterase 1
208249_s_at	4.32437	TGDS	TDP-glucose 4,6-dehydratase
215240_at	4.3125	ITGB3	integrin, beta 3 (platelet glycoprotein IIIa, antigen CD61)
211031_s_at	4.30743	CLIP2	CAP-GLY domain containing linker protein 2
231003_at	4.30449	SLC35B3	solute carrier family 35, member B3
235074_at	4.27908	SPRED1	sprouty-related, EVH1 domain containing 1
217781_s_at	4.27788	ZFP106	zinc finger protein 106 homolog (mouse)
222446_s_at	4.27385	BACE2	beta-site APP-cleaving enzyme 2
224716_at	4.27043	SLC35B2	solute carrier family 35, member B2
232099_at	4.26852	PCDHB16	protocadherin beta 16
216210_x_at	4.26847	TRIOBP	TRIO and F-actin binding protein
235338_s_at	4.25984	SETDB2	SET domain, bifurcated 2
219105_x_at	4.25402	ORC6L	origin recognition complex, subunit 6 like (yeast)
235147_at	4.25	LOC100288092	Hypothetical protein LOC100288092
242470_at	4.24877	EID2B	EP300 interacting inhibitor of differentiation 2B
243087_at	4.24172	WDR63	WD repeat domain 63
219509_at	4.24016	MYOZ1	myozenin 1
242807_at	4.2383	FSD1L	fibronectin type III and SPRY domain containing 1-like
204622_x_at	4.23457	NR4A2	nuclear receptor subfamily 4, group A, member 2
200677_at	4.22428	PTTG1IP	pituitary tumor-transforming 1 interacting protein
222807_at	4.21148	C11orf30	chromosome 11 open reading frame 30
235736_at	4.20732	LOC100287482	Similar to hCG2038584
1560916_a_at	4.20321	DPY19L1	dpy-19-like 1 (C. elegans)
219400_at	4.20312	CNTNAP1	contactin associated protein 1
202260_s_at	4.20118	STXBP1	syntaxin binding protein 1
223264_at	4.19372	MESDC1	mesoderm development candidate 1
227350_at	4.193	HELLS	helicase, lymphoid-specific
226820_at	4.18728	ZNF362	zinc finger protein 362
229092_at	4.16167	NR2F2	nuclear receptor subfamily 2, group F, member 2
221823_at	4.15108	C5orf30	chromosome 5 open reading frame 30
225385_s_at	4.14912	HNRPLL	heterogeneous nuclear ribonucleoprotein L-like
206414_s_at	4.14909	ASAP2	ArfGAP with SH3 domain, ankyrin repeat and PH domain 2
1554140_at	4.14407	WDR78	WD repeat domain 78
202125_s_at	4.12829	TRAK2	trafficking protein, kinesin binding 2
244424_at	4.11585	LOC439938	hypothetical gene supported by NM_178534
220703_at	4.11136	C10orf110	chromosome 10 open reading frame 110
219342_at	4.10864	CASD1	CAS1 domain containing 1
221538_s_at	4.10748	PLXNA1	plexin A1
216237_s_at	4.10698	MCM5	minichromosome maintenance complex component 5
212297_at	4.10502	ATP13A3	ATPase type 13A3
213096_at	4.1038	TMCC2	transmembrane and coiled-coil domain family 2
235593_at	4.10241	ZEB2	zinc finger E-box binding homeobox 2
217428_s_at	4.08857	COL10A1	collagen, type X, alpha 1
228401_at	4.08797	ATAD2	ATPase family, AAA domain containing 2
238977_at	4.06886	MCM6	minichromosome maintenance complex component 6
228913_at	4.0668	LOC100190939	hypothetical LOC100190939
201792_at	4.05986	AEBP1	AE binding protein 1
214075_at	4.05882	NENF	neuron derived neurotrophic factor
220952_s_at	4.04977	PLEKHA5	pleckstrin homology domain containing, family A member 5
226962_at	4.04291	ZBTB41	zinc finger and BTB domain containing 41
227013_at	4.03944	LATS2	LATS, large tumor suppressor, homolog 2 (Drosophila)
231535_x_at	4.02993	ROPN1	ropporin, rhophilin associated protein 1
227040_at	4.02893	NHLRC3	NHL repeat containing 3
1552947_x_at	4.02692	ZNF114	zinc finger protein 114
213139_at	4.02351	SNAI2	snail homolog 2 (Drosophila)
226492_at	4.02206	SEMA6D	sema domain, transmembrane domain, and cytoplasmic domain, 6D
226433_at	4.0216	RNF157	ring finger protein 157
231882_at	4.01501	FLJ39632	hypothetical LOC642477

## Sheet: Sheet1
Supplementary Table2
List of genes contained in clusters with high enrichment scores (>3) associated with the metastatic lesion of the patient as identified by gene clustering analysis with DAVID software.
Cluster 1: Enrichment Score: 7.68
